# Supplementary material for: Immunotherapy drug target identification using machine learning and patient-derived tumour explant validation
Source: Research Square preprint supplement (doi:10.21203/rs.3.rs-5499857/v1), 2024-12-05
Supplement: Supplementary file 1 [file 19c5d23aa4c6751f33c33efc.xlsx]

## Sheet: Sheet1
Trial_ID	SpecimenDate	Sex	Age	MelanomaSubtype	SiteOfResection	StageAtResection	PriorSystemicTherapy (if any)	SubsequentSystemicTherapy (if any)	Outcome
MX437	2022-11-09	F	39	Cutaneous	LymphNode	3	Nil		Referred to local site for ongoing management Nov 22
MX443	2023-01-12	M	50	Cutaneous	LymphNode	3	Adjuvant anti-PD-1		Referred to local for ongoing management Jan 23
MX450	2023-02-23	M	70	Uveal	Liver	4	Nil	Tebentafusp	PD and RIP Feb2024
MX451	2023-03-03	F	70	Cutaneous	LymphNode	3	Adjuvant anti-PD-1	Adjuvant anti-PD-1	Recurrence
MX452	2023-03-09	M	83	Acral	LymphNode	3	Nil	Adjuvant anti-PD-1	NoRecurrence at Oct2024
MX456	2023-04-18	M	60	Acral	LymphNode	3	Nil	IpiNivo	PD and RIP Oct2023
MX459	2023-04-28	M	68	UnknownPrimary	Axilla	4	Nil	IpiNivo	CR
MX471	2023-07-19	F	76	Cutaneous	Local recurrence / in-transit at calf	3	Nil	Adjuvant anti-PD-1	Recurrence
