# Supplementary material for: Immunotherapy drug target identification using machine learning and patient-derived tumour explant validation
Source: Research Square preprint supplement (doi:10.21203/rs.3.rs-5499857/v1), 2024-12-05
Supplement: Supplementary file 2 [file 7c0303e60e04e24efb5fa240.docx]

## Supplementary Methods

### Check-point inhibitor (CPI) response prediction

#### Models for Bulk RNAseq and exome data

Models predicting CPI response were created using extreme gradient boosting techniques available from the XGBoost Python package (Chen and Guestrin, 2016) (version 2.1.0). We employed nested cross-validation with 10 train-test divisions (75%) to verify the consistency of prediction performance. Within each training set, model hyperparameters were optimised, in Optuna (Akiba *et al.*, 2019), using 10 times repeated 10-fold cross-validation, with ROC AUC as the metric and with sample allocation to folds stratified by response status and cancer type. The default Optuna tree-structured parzen estimator was employed for this purpose. The domains for hyperparameter search were those recommended in the XGBoost package (Chen and Guestrin, 2016). Under sampling of the majority class was implemented for each training fold using the imbalanced-learn package (Lemaitre et al., 2017) at a ratio of 1 to 1. The optimal hyperparameters were then used to fit an XGBoost regularised classifier on the entirety of each training set with the performance evaluated on the corresponding test set. Feature importance was determined according to **SHAP (Shapley Additive exPlanations)** Python package (version 0.45; (Lundberg et al., 2017)) and global absolute average values were aggregated across training sets.

#### Mutation-associated neoantigen scores

Most scRNAseq datasets lacked immunotherapy response labels. Therefore, a previously published measure, the mutation-associated neoantigen (MANA) score, was utilised as a surrogate label. This MANA score comprises a gene signature that was calculated for all CD8+ T cells (CD8A expression > 0) using AddModuleScore() from the Seurat package v4 (Hao *et al.*, 2021). We aggregated these scores for each sample by the upper quartile value to yield sample-specific representations of TME immune dynamics. Different MANA score definitions exist for skin and non-skin tumours (Caushi *et al.*, 2021; Oliveira *et al.*, 2021) and thus we used the appropriate gene signature for each of these categories. Since neoantigen-specific T cells are important mediators of CPI-unleased anti-tumour immune responses (Van Rooij *et al.*, 2013; Rizvi *et al.*, 2015; Fehlings *et al.*, 2017, 2019; George *et al.*, 2017; Kamphorst *et al.*, 2017), this metric serves as a valid surrogate of clinical response.  However, limitations include that clinical response depends on other host- and tumour specific factors (Litchfield *et al.*, 2021), alongside diverse TIME cell types (Pittet, Michielin and Migliorini, 2022).

#### Single cell RNAseq data models

Raw count data were extracted from each cell subtype after excluding normal, dying, or unknown cell subtypes, as well as CD8+ T subtypes (due to the risk of confounding as the MANA score is defined on these subtypes). Following the exclusion of mitochondrial genes, these data were pseudobulked and normalised using the variance-stabilisation transformation from DESeq2 (version 1.34.0; (Love, Huber and Anders, 2014)). Principal components analysis using the top 500 most varying genes was performed to identify drivers of batch effects. The removeBatchEffect() function from the limma package (version 3.50.3) was used to regress out the effect of source study, mitochondrial DNA percentage, and the number of expressed genes with raw counts > 5. Successful batch correction was confirmed by inspecting PCA biplots constructed from the corrected data.

Elastic net regression models were trained to predict sample-level MANA scores from pseudobulked, batch-corrected scRNAseq data for each cell subtype using scikit-learn (version 1.0.1; (Pedregosa *et al.*, 2011), with acceleration through scikit-learn-intelex 2021.4.0 (<https://pypi.org/project/scikit-learn-intelex/>)). 10 train-test splits (75% train) were created by stratifying on the MANA score decile. For each of these training sets, we performed hyperparameter optimization using Optuna and 5-fold quintuple cross-validation (stratifying these splits by MANA score deciles). The optimal hyperparameters were then used to fit an elastic net regularised linear regressor on the entirety of each training set with the performance evaluated on the corresponding test set. To further characterise model behaviour, we additionally developed 100 randomised null models for each cell subtype by randomly shuffling sample MANA scores and repeating the modelling process for 100 randomised train-test split (75% train). Model performances and feature importances were benchmarked against these randomised nulls. Feature importance was determined according to **SHAP (SHapley Additive exPlanations)** Python package (version 0.41; (Lundberg et al., 2017)) and global absolute average values were aggregated across training sets.

### Meta learning approach for immune-oncology target discovery

#### Feature matrix including CPI prediction importance per gene

Feature importances associated with CPI prediction (excluding the CNA models due to low test set performances) and MANA regression models (excluding any models with MSE greater than two standard deviations above the median), for bulk and single cell data respectively, were considered as potential predictors. The importances were generated within the **SHAP** (Lundberg, Allen and Lee, 2017). To capture how antigen processing affects immunotherapy response, we downloaded publicly available HLA-peptidomic and matched bulk transcriptomic data for n=60 patients with cancer (Bulik-Sullivan *et al.*, 2018) and computed Pearson correlation coefficients for gene expression-HLA peptide presentation associations. Causal data on immune responses to genetic perturbation stemmed from n=7 publicly available CRISPR co-cultures and n=15,442 SNP-phenotype links. Biological context was provided through node degrees from Hetionet’s GiG network and GrG. Imputations were performed as described above for features common to both approaches. The GiG network degrees (here included as a feature whilst it formed the network topology for the MIDAS GIN) and the Shapley importance scores from CPI response and MANA score predictors were imputed as 0.

#### Meta-learners and Ensemble Stacking

Several meta-learners were trained on the feature matrix described above: elastic net (Pedregosa *et al.*, 2011), XGBoost (Chen and Guestrin, 2016), random forest (Pedregosa *et al.*, 2011) and support vector machine (Pedregosa *et al.*, 2011). The probability output of each of the meta-learners was used to train a simple logistic regression stacker predicting immune-oncology drug targets from the joint meta-learner output probability matrix. This third layer allows for a weighted mean of the probability outputs from each meta-learner leveraging heterogeneity within the probability outputs of each meta-learners to increase robustness in predictions in external datasets (Whalen and Pandey, 2013).

## References

Akiba, T. *et al.* (2019) ‘Optuna: A Next-generation Hyperparameter Optimization Framework’, *Proceedings of the ACM SIGKDD International Conference on Knowledge Discovery and Data Mining*, pp. 2623–2631. Available at: https://doi.org/10.1145/3292500.3330701.

Bulik-Sullivan, B. *et al.* (2018) ‘Deep learning using tumor HLA peptide mass spectrometry datasets improves neoantigen identification’, *Nature Biotechnology 2018 37:1*, 37(1), pp. 55–63. Available at: https://doi.org/10.1038/nbt.4313.

Caushi, J.X. *et al.* (2021) ‘Transcriptional programs of neoantigen-specific TIL in anti-PD-1-treated lung cancers’, *Nature 2021 596:7870*, 596(7870), pp. 126–132. Available at: https://doi.org/10.1038/s41586-021-03752-4.

Chen, T. and Guestrin, C. (2016) ‘XGBoost: A Scalable Tree Boosting System’, *Proceedings of the ACM SIGKDD International Conference on Knowledge Discovery and Data Mining*, 13-17-August-2016, pp. 785–794. Available at: https://doi.org/10.1145/2939672.2939785.

Fehlings, M. *et al.* (2017) ‘Checkpoint blockade immunotherapy reshapes the high-dimensional phenotypic heterogeneity of murine intratumoural neoantigen-specific CD8+ T cells’, *Nature Communications 2017 8:1*, 8(1), pp. 1–12. Available at: https://doi.org/10.1038/s41467-017-00627-z.

Fehlings, M. *et al.* (2019) ‘Late-differentiated effector neoantigen-specific CD8+ T cells are enriched in peripheral blood of non-small cell lung carcinoma patients responding to atezolizumab treatment’, *Journal for ImmunoTherapy of Cancer*, 7(1), p. 249. Available at: https://doi.org/10.1186/S40425-019-0695-9.

George, S. *et al.* (2017) ‘Loss of PTEN Is Associated with Resistance to Anti-PD-1 Checkpoint Blockade Therapy in Metastatic Uterine Leiomyosarcoma’, *Immunity*, 46(2), pp. 197–204. Available at: https://doi.org/10.1016/J.IMMUNI.2017.02.001.

Hao, Y. *et al.* (2021) ‘Integrated analysis of multimodal single-cell data’, *Cell*, 184(13), pp. 3573-3587.e29. Available at: https://doi.org/10.1016/J.CELL.2021.04.048/ATTACHMENT/1E5EB5C1-59EE-4B2B-8BFA-14B48A54FF8F/MMC3.XLSX.

Kamphorst, A.O. *et al.* (2017) ‘Proliferation of PD-1+ CD8 T cells in peripheral blood after PD-1-targeted therapy in lung cancer patients’, *Proceedings of the National Academy of Sciences of the United States of America*, 114(19), pp. 4993–4998. Available at: https://doi.org/10.1073/PNAS.1705327114/SUPPL_FILE/PNAS.201705327SI.PDF.

Lemaitre, G., Nogueira, F. and Aridas char, C.K. (2017) ‘Imbalanced-learn’, *The Journal of Machine Learning Research*, 18, pp. 1–5. Available at: https://doi.org/10.5555/3122009.3122026.

Litchfield, K. *et al.* (2021) ‘Meta-analysis of tumor- and T cell-intrinsic mechanisms of sensitization to checkpoint inhibition’, *Cell*, 184(3), pp. 596-614.e14. Available at: https://doi.org/10.1016/J.CELL.2021.01.002.

Love, M.I., Huber, W. and Anders, S. (2014) ‘Moderated estimation of fold change and dispersion for RNA-seq data with DESeq2’, *Genome Biology*, 15(12), pp. 1–21. Available at: https://doi.org/10.1186/S13059-014-0550-8/FIGURES/9.

Lundberg, S.M., Allen, P.G. and Lee, S.-I. (2017) ‘A Unified Approach to Interpreting Model Predictions’, *Advances in Neural Information Processing Systems*, 30. Available at: https://github.com/slundberg/shap (Accessed: 13 July 2024).

Oliveira, G. *et al.* (2021) ‘Phenotype, specificity and avidity of antitumour CD8+ T cells in melanoma’, *Nature 2021 596:7870*, 596(7870), pp. 119–125. Available at: https://doi.org/10.1038/s41586-021-03704-y.

Pedregosa, F. *et al.* (2011) ‘Scikit-learn: Machine Learning in Python’, *Journal of Machine Learning Research*, 12(85), pp. 2825–2830. Available at: http://jmlr.org/papers/v12/pedregosa11a.html (Accessed: 5 November 2022).

Pittet, M.J., Michielin, O. and Migliorini, D. (2022) ‘Clinical relevance of tumour-associated macrophages’, *Nature Reviews Clinical Oncology 2022 19:6*, 19(6), pp. 402–421. Available at: https://doi.org/10.1038/s41571-022-00620-6.

Rizvi, N.A. *et al.* (2015) ‘Mutational landscape determines sensitivity to PD-1 blockade in non-small cell lung cancer’, *Science*, 348(6230), pp. 124–128. Available at: https://doi.org/10.1126/SCIENCE.AAA1348/SUPPL_FILE/RIZVI-SM.PDF.

Van Rooij, N. *et al.* (2013) ‘Tumor exome analysis reveals neoantigen-specific T-cell reactivity in an ipilimumab-responsive melanoma’, *Journal of Clinical Oncology*, 31(32). Available at: https://doi.org/10.1200/JCO.2012.47.7521.

Whalen, S. and Pandey, G. (2013) ‘A comparative analysis of ensemble classifiers: Case studies in genomics’, *Proceedings - IEEE International Conference on Data Mining, ICDM*, pp. 807–816. Available at: https://doi.org/10.1109/ICDM.2013.21.
